# Supplementary material for: Sex-specific growth arrest in a lizard
Source: PubMed Central journal article supplement — iScience. 2022 Mar 9;25(4):104041. doi: 10.1016/j.isci.2022.104041 (PMC8957014; doi:10.1016/j.isci.2022.104041), 2022-03-09
Supplement: mmc1.pdf [file mmc1.pdf]

**iScience, Volume 25**

**Supplemental information**

**Sex-specific growth arrest in a lizard**

**Lukáš Kubička, Adam Tureček, Tomáš Kučera, and Lukáš Kratochvíl**

**Table S1. Summary of Akaike information criterion (AIC) for logistic regressions.**

The model tests the association of snout-vent length, age, and sex with the closing of femoral growth plates. The best models selected based on AIC are highlighted by asterisks. Related to Figure 2.

|                | <b>Model</b>                                   | <b>AIC</b> |
|----------------|------------------------------------------------|------------|
| Proximal femur | Growth plate closing ~ 1 (the null model)      | 119.15     |
| Proximal femur | Growth plate closing ~ Snout-vent length       | 68.24      |
| Proximal femur | Growth plate closing ~ Snout-vent length + Sex | 58.27*     |
| Distal femur   | Growth plate closing ~ 1 (the null model)      | 45.95      |
| Distal femur   | Growth plate closing ~ Age                     | 23.64*     |
| Distal femur   | Growth plate closing ~ Age + Sex               | 23.96      |
| Distal femur   | Growth plate closing ~ 1 (the null model)      | 45.95      |
| Distal femur   | Growth plate closing ~ Snout-vent length       | 36.53*     |
| Distal femur   | Growth plate closing ~ Snout-vent length + Sex | 38.13      |

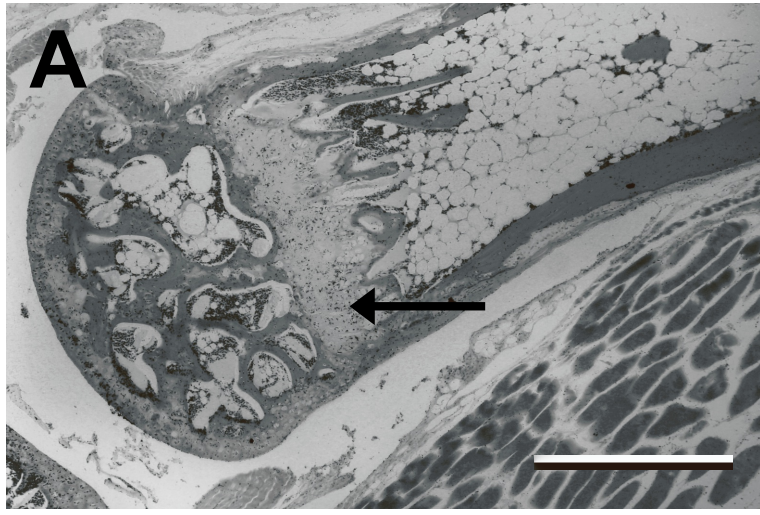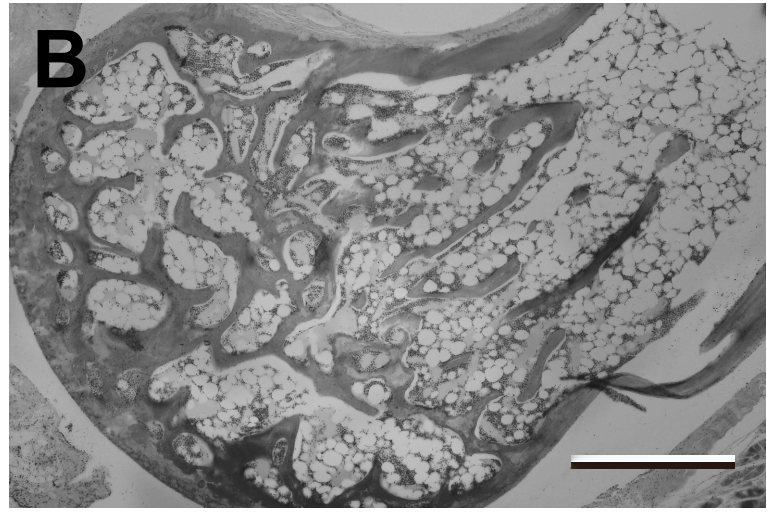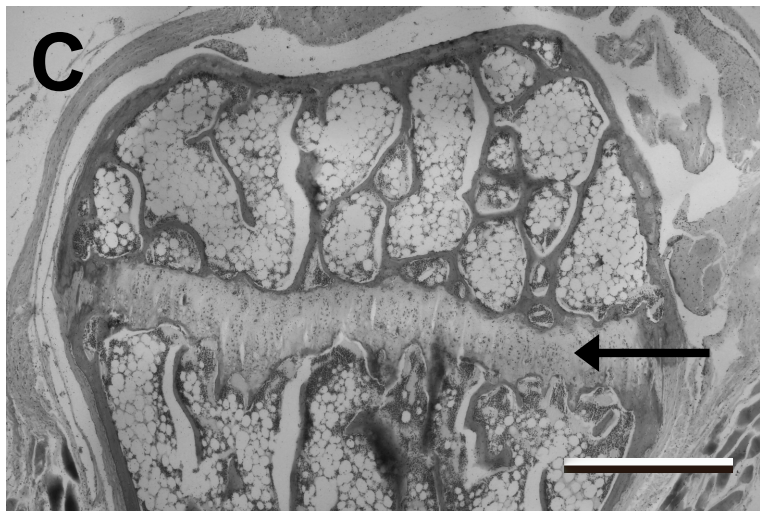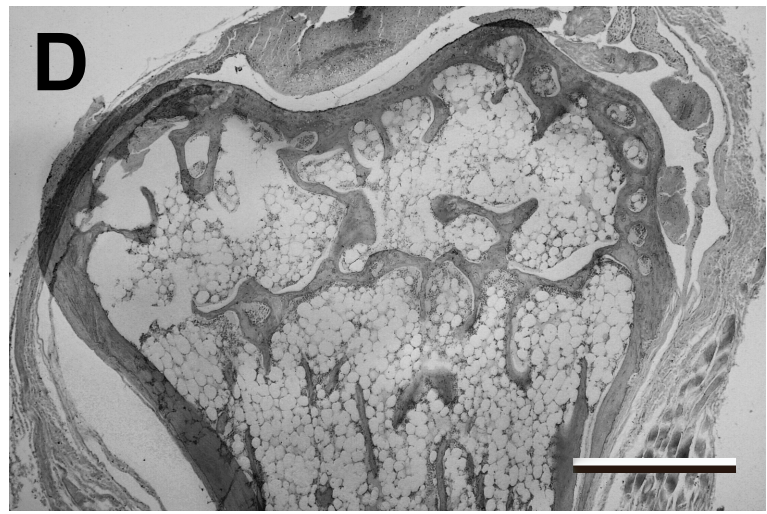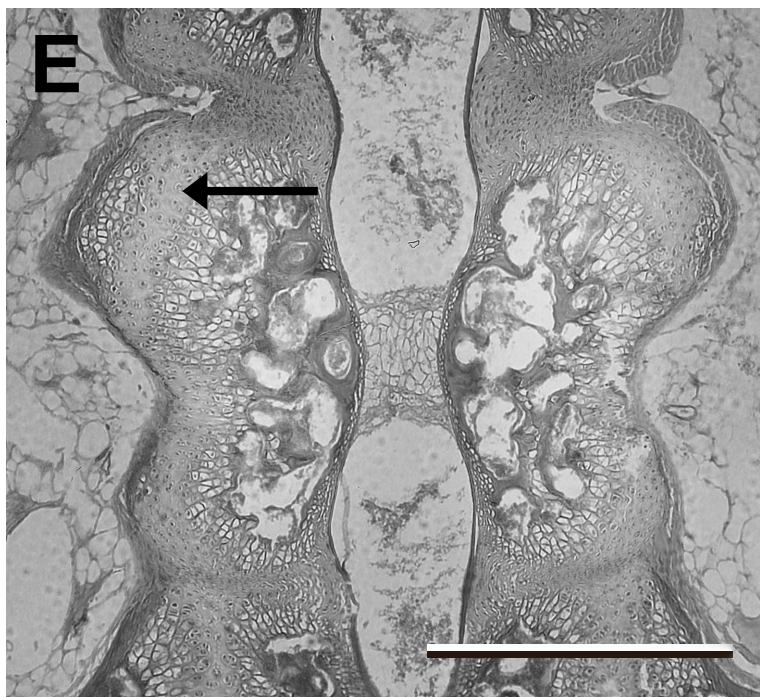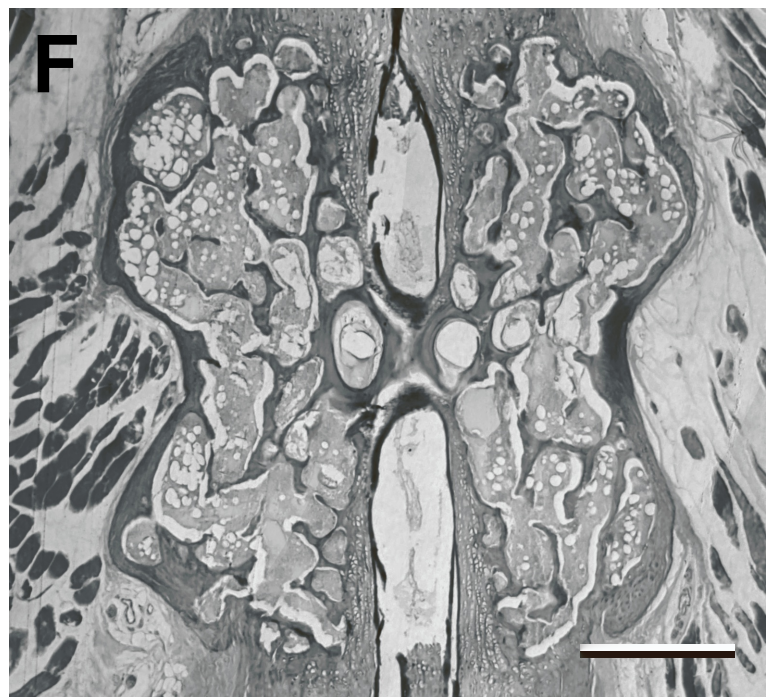

**Figure S1. Examples of growth plate activity at different anatomical sites. (A) open and (B) closed growth plate of the proximal femur. (C) open and (D) closed growth plate of the distal femur. (E) open and (F) closed growth plate of the most caudal presacral vertebra. Arrows point to active growth plates, bars represent 0.5 mm. Related to STAR Methods.**
